# Supplementary material for: A prospective follow-up of thyroid volume and thyroiditis features on ultrasonography among survivors of predominantly mild to moderate COVID-19
Source: PeerJ. 2023 Mar 17;11:e15034. doi: 10.7717/peerj.15034 (PMC10026714; doi:10.7717/peerj.15034)
Supplement: Data S1 [file peerj-11-15034-s001.xlsx]

## Sheet: Sheet1
ReferenceKey	ICU	Sex1M2F	DOA	ThyroiditisResolved	Age	BMI	BaseCS1mild2mod3severe4critical	WorstClinicalSeverity1mild2mod3severe4critical	TSH	AbnTSH	fT4	AbnormalfT4	fT3	AbnT3	Smoking	Drinking	RantiTPO	RantiTg	BaseTG	AbnormalTFT	BaseTGPos	BaseTPOPos	BaseTPO	TPOTGPos	RantiTPOpos	RantiTgPOS	BaseESR	PeakESR	BaseCRP	BaseCRPPos	PeakCRP	PeakCRPPos	ThyroidVolR	ThyroidVol	ThyroidVolDiff	ThyroidVolDiffPercent	ECHOR	SubmandR	VascularityR	Echo	Submand	Vascularity	Base_CTNPSTS	NadirCTNPSTS	Rtsh	RfT4	RCRP	FinalDC	LOSFinal
1523818	0	2	2020-12-28	0	54	18.8062	2	2	1.5	0	13	0	2.5	1	0	0	0	123	128.29	1	1	0	34.32	#NULL!	0	1	44	44	2.88	1	2.88	1	10.7017	7.66406	3.0376	39.6343	2	1	1	2	1	2	20.4	17.2	1.6	17	#NULL!	2021-01-05	8
4192220	0	2	2020-12-09	1	52	19.992	2	2	0.87	0	23	0	4.1	0	0	0	0	0	12.67	0	0	0	50.25	0	0	0	115	115	6.11	1	6.11	1	8.55742	5.8951	2.66232	45.1617	1	1	2	2	1	2	29.1	29.1	0.73	18	#NULL!	2020-12-13	4
1695115	0	1	2020-12-21	1	47	25.1804	2	2	2.3	0	14	0	3.8	0	0	0	0	0	12.09	0	0	0	22.45	0	0	0	49	49	2.82	1	2.82	1	21.1863	20.1493	1.03699	5.14654	1	1	2	2	1	2	23.5	22.81	2.4	20	#NULL!	2020-12-28	7
6407246	0	1	2020-12-18	1	64	24.1522	2	2	0.71	0	17	0	3.6	0	0	0	0	0	11.15	0	0	0	27.75	0	0	0	82	82	5.5	1	5.5	1	26.7198	15.1092	11.6106	76.8447	1	1	2	1	1	1	23.5	23.5	1	17	#NULL!	2020-12-24	6
9450140	0	2	2020-12-11	1	48	31.5834	2	2	0.77	0	18	0	4.3	0	0	0	0	0	#NULL!	0	#NULL!	#NULL!	#NULL!	#NULL!	0	0	55	55	0.737	0	0.927	1	16.1106	14.554	1.55652	10.6948	1	1	2	2	1	2	35.6	35.6	1.4	17	#NULL!	2020-12-18	7
1140085	0	1	2020-12-06	1	57	25.6732	1	1	#NULL!	#NULL!	#NULL!	#NULL!	#NULL!	#NULL!	0	0	#NULL!	#NULL!	#NULL!	#NULL!	#NULL!	#NULL!	#NULL!	#NULL!	#NULL!	#NULL!	#NULL!	#NULL!	0.34	0	2.9	1	10.4784	8.84654	1.6319	18.4467	1	1	2	1	1	1	13.4	13.4	1.2	15	0	2020-12-16	10
6335531	0	1	2020-12-26	1	52	31.4627	2	3	#NULL!	#NULL!	#NULL!	#NULL!	#NULL!	#NULL!	0	0	99	0	#NULL!	#NULL!	#NULL!	#NULL!	#NULL!	#NULL!	0	0	#NULL!	#NULL!	16.3	1	20.3	1	30.4	27.1347	3.2652	12.0333	1	1	2	1	1	3	26	22.83	2.1	20	0.56	2021-01-08	13
12581497	0	2	2020-07-22	#NULL!	36	26.7988	1	1	1.2	0	16	0	3.8	0	1	0	650	91	104.63	0	1	1	604.64	1	1	0	22	33	0.311	0	0.326	0	12.4384	9.35825	3.08017	32.9139	1	1	2	1	1	2	15.34	15.34	2.2	15	#NULL!	2020-08-09	18
3847392	0	1	2020-11-25	#NULL!	89	23.6972	1	2	3.6	0	16	0	3.4	0	0	0	632	654	817.77	0	1	1	895.53	1	1	1	25	25	1	1	5.23	1	14.5905	11.7732	2.81723	23.929	1	1	2	1	1	2	20.1	18.89	1.7	18	#NULL!	2020-12-03	8
31028	0	1	2020-08-29	#NULL!	55	35.0928	1	1	1.7	0	20	0	4.7	0	0	0	204	0	9.03	0	0	1	272.19	1	1	0	#NULL!	#NULL!	2.78	1	2.78	1	30.546	25.1726	5.37342	21.3464	1	1	2	1	2	2	30.82	30.82	0.96	18	0.69	2020-08-31	2
6069766	0	2	2020-12-10	#NULL!	46	29.5703	2	2	2.7	0	19	0	3.8	0	0	0	121	0	8	0	0	1	174.23	1	1	0	56	56	2.02	1	2.02	1	13.9004	13.1517	0.748639	5.69232	1	1	2	1	2	2	27.2	27.2	2.4	18	#NULL!	2020-12-12	2
11540824	0	1	2020-12-28	#NULL!	25	25.7174	1	1	1.5	0	18	0	4.1	0	0	0	187	0	12.71	0	0	0	180.71	1	1	0	#NULL!	#NULL!	0.312	0	0.312	0	18.159	15.5642	2.59481	16.6717	1	1	2	1	1	2	17.7	17.7	1	18	0	2020-12-28	0
942419	0	1	2020-08-06	#NULL!	46	22.5573	1	3	0.56	0	17	0	2.9	1	0	0	0	0	3.73	1	0	0	27.05	0	0	0	24	61	1.34	1	6.33	1	9.6198	7.06026	2.55955	36.2529	1	1	2	1	1	2	16.42	16.42	2.1	19	0	2020-08-19	13
6485013	0	2	2020-12-04	#NULL!	70	26.6991	2	2	0.87	0	14	0	3.3	0	0	0	0	0	27.27	0	0	0	25.27	0	0	0	67	67	3.45	1	4.49	1	7.90353	6.81603	1.0875	15.9551	1	1	2	1	2	2	19.6	19.46	1.6	13	#NULL!	2020-12-11	7
6293388	0	1	2020-12-06	#NULL!	19	28.2958	1	1	2.1	0	15	0	4.8	0	0	0	0	0	11.84	0	0	0	18.74	0	0	0	#NULL!	#NULL!	3.57	1	3.57	1	16.9831	8.97374	8.00934	89.2531	1	1	2	1	1	2	15.15	15.15	1.9	19	#NULL!	2020-12-26	20
10933043	0	1	2020-12-17	#NULL!	50	33.2054	1	1	1.7	0	16	0	4.2	0	0	1	0	0	12.13	0	0	0	59.06	0	0	0	14	14	0.505	0	0.505	0	10.7516	9.39517	1.35639	14.4371	1	2	2	1	1	2	32.69	32.69	2	15	#NULL!	2020-12-19	2
2439263	0	2	2020-11-22	#NULL!	59	22.8737	1	1	0.11	1	15	0	3.3	0	0	0	0	0	7.13	1	0	0	14.62	0	0	0	66	66	1.03	1	1.03	1	10.5422	7.82253	2.71967	34.7671	1	1	2	1	1	2	28.1	20.66	1.3	19	#NULL!	2020-12-08	16
5865053	0	1	2020-11-30	#NULL!	51	24.3482	2	2	0.79	0	19	0	4.2	0	0	1	0	0	5.72	0	0	0	14.37	0	0	0	40	40	3.15	1	4.19	1	21.7265	13.8608	7.86572	56.748	1	1	2	1	1	2	30.57	28.64	1.5	19	#NULL!	2020-12-08	8
12656370	0	2	2020-12-02	#NULL!	54	19.313	2	2	2.2	0	15	0	3	1	0	0	0	0	12.11	1	0	0	37.63	0	0	0	42	42	0.398	0	0.398	0	10.7096	8.21836	2.49124	30.3131	1	1	2	1	1	2	33.3	30.11	2.3	16	#NULL!	2020-12-04	2
2702888	0	2	2020-11-20	#NULL!	63	22.4466	1	1	0.47	0	19	0	3.9	0	0	0	0	0	11.04	0	0	0	33.95	0	0	0	30	30	0.882	1	0.882	1	8.16019	7.14367	1.01652	14.2297	1	1	2	1	1	2	27.66	14.12	1.4	20	0	2020-11-29	9
1533898	0	1	2020-12-01	#NULL!	49	27.5466	1	1	1.5	0	17	0	4.9	0	0	1	0	0	23.59	0	0	0	28.65	0	0	0	#NULL!	#NULL!	1.04	1	1.04	1	25.8912	16.5905	9.30069	56.0602	1	1	2	1	1	2	20.45	20.31	1.3	17	0	2020-12-30	29
5135613	0	2	2020-12-15	#NULL!	69	29.3623	1	2	0.24	1	13	0	3.2	0	0	0	0	0	16.23	1	0	0	24.69	0	0	0	30	30	1.3	1	1.3	1	12.0853	11.3703	0.715033	6.28861	1	1	2	1	1	2	21.1	12.86	0.76	17	0	2020-12-28	13
903386	0	2	2020-11-29	#NULL!	65	29.1475	1	2	0.74	0	16	0	3.6	0	0	0	0	0	5.34	0	0	0	16.66	0	0	0	47	98	0.522	0	8.41	1	10.0092	7.73491	2.27426	29.4025	1	1	2	1	2	2	12.2	12.2	0.87	19	#NULL!	2020-12-12	13
9464102	0	1	2020-12-03	#NULL!	72	25.7996	2	2	1.2	0	17	0	4.4	0	0	0	0	0	10.04	0	0	0	40.77	0	0	0	54	54	0.426	0	0.616	0	13.4765	12.1666	1.30994	10.7667	1	1	2	1	1	2	20	20	1.3	15	#NULL!	2020-12-08	5
5226870	1	2	2020-12-03	#NULL!	64	26.8889	1	4	0.93	0	15	0	#NULL!	0	0	0	0	0	14.46	0	0	0	8.34	0	0	0	34	34	3.5	1	3.5	1	10.6684	9.79933	0.86909	8.86887	1	1	2	1	1	2	20.6	19.16	2.9	16	#NULL!	2020-12-18	15
12650865	0	1	2020-11-21	#NULL!	53	21.6389	1	1	0.52	0	18	0	3.9	0	1	1	0	0	5.61	0	0	0	34.29	0	0	0	#NULL!	#NULL!	0.312	0	0.971	1	15.6231	12.9707	2.6524	20.4492	1	1	2	1	1	2	14.5	14.5	0.77	20	#NULL!	2020-12-03	12
2025692	0	2	2020-11-21	#NULL!	64	22.8625	1	2	0.74	0	17	0	3.4	0	0	0	0	0	8.09	0	0	0	43.22	0	0	0	#NULL!	#NULL!	0.312	0	0.349	0	7.7842	6.639	1.14519	17.2495	1	1	2	1	1	2	13.7	13.7	1	18	#NULL!	2020-12-05	14
9149788	0	2	2020-11-28	#NULL!	64	19.9022	2	2	0.78	0	18	0	3.8	0	0	0	0	0	6.67	0	0	0	9	0	0	0	23	92	1.53	1	4.76	1	11.2413	8.3885	2.85277	34.0081	1	1	2	1	1	2	15.2	15.16	1.4	18	0	2020-12-08	10
9951198	0	1	2020-12-12	#NULL!	41	29.6551	2	3	0.57	0	20	0	4.1	0	0	0	0	0	6.81	0	0	0	13.59	0	0	0	46	46	11.9	1	15.1	1	16.6012	15.3631	1.23805	8.0586	1	1	2	1	1	2	17.66	17.66	1.3	22	#NULL!	2020-12-24	12
2894927	0	1	2020-12-24	#NULL!	26	32.9314	1	1	0.8	0	19	0	4.8	0	0	0	0	0	9.09	0	0	0	19.08	0	0	0	#NULL!	#NULL!	1.6	1	1.82	1	21.2378	17.5705	3.66726	20.8716	1	1	2	1	2	2	29	29	1.4	17	0.7	2020-12-26	2
954526	0	2	2020-12-04	#NULL!	41	18.8672	2	2	1.1	0	21	0	4.5	0	0	0	0	0	14.26	0	0	0	26.13	0	0	0	55	55	2.83	1	5.87	1	14.6353	12.215	2.42031	19.8143	1	1	2	1	1	2	28.3	18.72	0.88	19	#NULL!	2020-12-12	8
6470120	0	1	2020-12-26	#NULL!	34	33.8908	2	2	0.7	0	12	0	3.5	0	0	0	0	0	11.77	0	0	0	70.33	0	0	0	46	46	4.7	1	7.78	1	13.4577	7.94471	5.51298	69.3919	1	1	2	1	1	2	25.4	25.4	0.8	15	#NULL!	2021-01-03	8
2427338	0	2	2020-07-13	#NULL!	64	33.695	1	3	#NULL!	#NULL!	#NULL!	#NULL!	#NULL!	#NULL!	0	0	0	0	#NULL!	#NULL!	#NULL!	#NULL!	#NULL!	#NULL!	0	0	81	126	1.95	1	8.35	1	21.7117	18.5734	3.1383	16.8968	1	1	2	1	1	2	17.6	17.6	1.8	18	0	2020-07-27	14
4155507	0	1	2020-07-20	#NULL!	40	27.7509	1	1	#NULL!	#NULL!	#NULL!	#NULL!	#NULL!	#NULL!	0	0	186	95	#NULL!	#NULL!	#NULL!	#NULL!	#NULL!	#NULL!	1	0	25	48	2.74	1	2.74	1	13.6906	12.1299	1.56069	12.8665	1	1	2	1	1	2	17.54	17.54	3.4	17	0	2020-07-31	11
3560169	0	1	2020-12-01	#NULL!	42	22.9854	1	1	#NULL!	#NULL!	#NULL!	#NULL!	#NULL!	#NULL!	1	1	81	0	#NULL!	#NULL!	#NULL!	#NULL!	#NULL!	#NULL!	0	0	#NULL!	#NULL!	0.04	0	0.1	0	18.2891	12.3633	5.92584	47.9308	1	1	2	1	1	2	16.7	16.7	0.76	19	0	2020-12-08	7
10215177	1	1	2020-12-03	#NULL!	52	33.8843	3	4	#NULL!	#NULL!	#NULL!	#NULL!	#NULL!	#NULL!	0	0	77	0	#NULL!	#NULL!	#NULL!	#NULL!	#NULL!	#NULL!	0	0	#NULL!	#NULL!	16.3	1	19.8	1	12.5729	12.4841	0.088795	0.711271	1	1	2	1	1	2	26.3	26.3	0.88	17	0	2020-12-16	13
5549695	0	1	2020-12-21	#NULL!	51	23.5139	2	2	#NULL!	#NULL!	#NULL!	#NULL!	#NULL!	#NULL!	0	0	109	0	#NULL!	#NULL!	#NULL!	#NULL!	#NULL!	#NULL!	1	0	57	57	9.09	1	10.1	1	9.38043	9.07103	0.309405	3.41092	1	1	2	1	1	2	28.4	27.8	1.1	16	#NULL!	2020-12-26	5
6952862	0	2	2020-12-14	#NULL!	61	31.5011	2	2	#NULL!	#NULL!	#NULL!	#NULL!	#NULL!	#NULL!	0	0	#NULL!	#NULL!	#NULL!	#NULL!	#NULL!	#NULL!	#NULL!	#NULL!	#NULL!	#NULL!	#NULL!	#NULL!	0.37	0	0.37	0	27.816	14.5195	13.2965	91.5768	1	1	2	1	1	2	30.6	30.6	0.48	20	#NULL!	2020-12-19	5
8980299	0	1	2020-12-15	#NULL!	47	29.114	1	1	#NULL!	#NULL!	#NULL!	#NULL!	#NULL!	#NULL!	1	1	#NULL!	#NULL!	#NULL!	#NULL!	#NULL!	#NULL!	#NULL!	#NULL!	#NULL!	#NULL!	#NULL!	#NULL!	0.14	0	0.14	0	21.4294	18.4147	3.01472	16.3713	1	2	2	1	1	2	23.4	23.4	#NULL!	#NULL!	#NULL!	2020-12-22	7
5785972	0	1	2020-12-31	#NULL!	28	19.2841	1	1	#NULL!	#NULL!	#NULL!	#NULL!	#NULL!	#NULL!	0	0	0	0	#NULL!	#NULL!	#NULL!	#NULL!	#NULL!	#NULL!	0	0	#NULL!	#NULL!	0.92	1	0.92	1	9.67703	6.69284	2.98419	44.5877	1	1	2	1	1	2	15.2	15.2	3.8	19	0	2021-01-10	10
4929514	0	1	2020-12-10	#NULL!	27	22.566	1	1	#NULL!	#NULL!	#NULL!	#NULL!	#NULL!	#NULL!	0	0	0	0	#NULL!	#NULL!	#NULL!	#NULL!	#NULL!	#NULL!	0	0	#NULL!	#NULL!	0.34	0	2.1	1	10.3227	8.57467	1.748	20.3857	1	1	2	1	1	2	20.17	19.66	1.9	21	0	2020-12-23	13
2520083	0	1	2020-12-12	#NULL!	31	34.6743	1	1	#NULL!	#NULL!	#NULL!	#NULL!	#NULL!	#NULL!	0	0	0	0	#NULL!	#NULL!	#NULL!	#NULL!	#NULL!	#NULL!	0	0	#NULL!	#NULL!	1	1	1	1	11.7275	9.80575	1.92176	19.5983	1	2	2	1	1	2	17.6	17.6	0.96	20	0	2020-12-24	12
1409173	0	1	2021-01-02	#NULL!	27	17.9542	1	1	#NULL!	#NULL!	#NULL!	#NULL!	#NULL!	#NULL!	0	0	0	0	#NULL!	#NULL!	#NULL!	#NULL!	#NULL!	#NULL!	0	0	#NULL!	#NULL!	0	0	0.01	0	8.35013	7.86626	0.483869	6.15119	1	1	2	1	1	2	29.08	29.08	1.8	18	#NULL!	2021-01-12	10
83894	0	1	2021-01-03	#NULL!	59	25.822	1	2	#NULL!	#NULL!	#NULL!	#NULL!	#NULL!	#NULL!	0	0	66	0	#NULL!	#NULL!	#NULL!	#NULL!	#NULL!	#NULL!	0	0	#NULL!	#NULL!	1.1	1	1.5	1	10.9882	7.92572	3.06245	38.6394	1	1	2	1	1	2	16.44	16.44	1.2	14	#NULL!	2021-01-18	15
3968809	0	1	2021-01-14	#NULL!	46	29.5603	1	1	#NULL!	#NULL!	#NULL!	#NULL!	#NULL!	#NULL!	0	0	0	0	#NULL!	#NULL!	#NULL!	#NULL!	#NULL!	#NULL!	0	0	#NULL!	#NULL!	0.2	0	1.7	1	10.63	7.94773	2.68225	33.7486	1	1	2	1	1	2	16.87	16.87	1.2	11	0	2021-01-28	14
12666536	0	1	2020-12-19	#NULL!	27	28.8914	1	1	#NULL!	#NULL!	#NULL!	#NULL!	#NULL!	#NULL!	0	0	63	0	#NULL!	#NULL!	#NULL!	#NULL!	#NULL!	#NULL!	0	0	#NULL!	#NULL!	5.9	1	5.9	1	7.54809	7.52551	0.022572	0.299942	1	1	2	1	3	2	18.5	18.5	3.5	17	#NULL!	2020-12-31	12
5354238	0	1	2021-01-11	#NULL!	47	23.3355	1	1	#NULL!	#NULL!	#NULL!	#NULL!	#NULL!	#NULL!	0	0	0	0	#NULL!	#NULL!	#NULL!	#NULL!	#NULL!	#NULL!	0	0	#NULL!	#NULL!	0.56	0	0.56	0	14.8905	13.5494	1.34101	9.89717	1	1	2	1	1	2	32	32	1.2	17	0	2021-01-12	1
9711466	0	1	2020-12-22	#NULL!	25	28.1787	1	1	#NULL!	#NULL!	#NULL!	#NULL!	#NULL!	#NULL!	1	1	0	0	#NULL!	#NULL!	#NULL!	#NULL!	#NULL!	#NULL!	0	0	#NULL!	#NULL!	0.14	0	0.14	0	22.5371	15.8134	6.72373	42.5193	1	1	2	1	1	2	35.58	33.47	0.92	13	0	2020-12-28	6
901153	0	2	2020-11-22	#NULL!	67	22.8545	1	1	2.1	0	12	0	4.4	0	0	0	#NULL!	#NULL!	607.31	0	1	1	861.76	1	#NULL!	#NULL!	#NULL!	#NULL!	0.98	1	4.33	1	#NULL!	9.72646	#NULL!	#NULL!	#NULL!	#NULL!	#NULL!	2	2	2	13.3	13.3	#NULL!	#NULL!	#NULL!	2020-12-02	10
9785220	0	1	2020-12-10	#NULL!	48	29.456	1	1	4.1	0	11	1	4.2	0	0	1	#NULL!	#NULL!	205.49	1	1	1	100.09	1	#NULL!	#NULL!	34	34	0.576	0	0.576	0	#NULL!	9.65901	#NULL!	#NULL!	#NULL!	#NULL!	#NULL!	1	1	2	19.3	17.14	#NULL!	#NULL!	#NULL!	2020-12-20	10
8730526	0	2	2020-12-14	#NULL!	56	23.207	2	2	1.7	0	20	0	4.3	0	0	0	#NULL!	#NULL!	3936.5	0	1	0	19.58	1	#NULL!	#NULL!	73	73	1.43	1	1.43	1	#NULL!	9.58896	#NULL!	#NULL!	#NULL!	#NULL!	#NULL!	1	1	2	37.1	30.25	#NULL!	#NULL!	#NULL!	2020-12-15	1
12083502	0	2	2020-07-24	#NULL!	30	23.9293	1	1	1	0	17	0	4.1	0	0	0	0	0	5.98	0	0	0	17.21	0	0	0	15	15	0.311	0	0.311	0	5.60767	5.70558	-0.097912	-1.71607	1	1	2	1	1	2	27.6	22.84	1.3	16	#NULL!	2020-08-04	11
12593017	0	1	2020-08-16	#NULL!	31	34.6963	2	3	0.57	0	23	0	4.6	0	0	1	0	0	6.12	0	0	0	35.59	0	0	0	50	50	4.46	1	7.77	1	16.9607	17.1903	-0.229652	-1.33594	1	1	2	1	1	2	29.84	25.19	0.78	18	#NULL!	2020-08-23	7
4454109	0	1	2020-11-21	#NULL!	59	24.8591	1	1	1.3	0	18	0	4.1	0	0	0	#NULL!	#NULL!	9.54	0	0	0	20.09	0	#NULL!	#NULL!	9	18	0.312	0	0.312	0	#NULL!	13.6989	#NULL!	#NULL!	#NULL!	#NULL!	#NULL!	1	1	2	16.2	13.19	#NULL!	#NULL!	#NULL!	2020-12-05	14
6897125	0	2	2020-11-21	#NULL!	68	18.5403	2	2	2.4	0	17	0	2.5	1	0	0	#NULL!	#NULL!	5.82	1	0	0	36.31	0	#NULL!	#NULL!	#NULL!	#NULL!	2.85	1	2.85	1	#NULL!	5.79219	#NULL!	#NULL!	#NULL!	#NULL!	#NULL!	1	1	2	17.5	16.93	#NULL!	#NULL!	#NULL!	2020-11-30	9
4382329	0	1	2020-11-22	#NULL!	69	23.093	1	1	1	0	16	0	4.5	0	0	0	#NULL!	#NULL!	5.18	0	0	0	92.72	0	#NULL!	#NULL!	#NULL!	#NULL!	0.312	0	2.95	1	#NULL!	10.0677	#NULL!	#NULL!	#NULL!	#NULL!	#NULL!	1	1	2	35.2	15.25	#NULL!	#NULL!	#NULL!	2020-12-07	15
168832	0	1	2020-12-03	#NULL!	54	29.7265	2	3	0.61	0	17	0	3.9	0	0	1	0	0	8.32	0	0	0	54.24	0	0	0	71	71	12.5	1	12.5	1	9.90268	11.4268	-1.52416	-13.3385	1	1	2	1	1	2	29.1	25.34	1.6	19	#NULL!	2020-12-10	7
12658612	0	1	2020-12-04	#NULL!	60	22.9855	1	2	0.66	0	16	0	3.7	0	0	1	#NULL!	#NULL!	9.79	0	0	0	24.43	0	#NULL!	#NULL!	62	62	0.312	0	5.57	1	#NULL!	11.1227	#NULL!	#NULL!	#NULL!	#NULL!	#NULL!	1	1	2	17	14.13	#NULL!	#NULL!	#NULL!	2020-12-18	14
6446063	0	1	2020-12-22	#NULL!	39	28.7347	2	2	0.45	0	16	0	2.8	1	1	1	0	0	11.08	1	0	0	33.68	0	0	0	43	43	2.4	1	3.58	1	12.1441	14.6992	-2.55515	-17.3829	1	1	2	1	1	2	26.9	23.25	1.4	15	#NULL!	2020-12-26	4
4374944	0	2	2020-12-08	#NULL!	51	19.2965	2	2	1	0	15	0	4.2	0	0	0	0	0	16.95	0	0	0	26.1	0	0	0	58	58	0.885	1	0.885	1	19.4163	19.4681	-0.05175	-0.265819	1	1	2	1	1	2	26.8	26.8	0.69	14	#NULL!	2020-12-12	4
3955213	0	1	2020-12-24	#NULL!	22	23.0609	1	1	0.82	0	19	0	5.1	0	1	1	#NULL!	#NULL!	17.39	0	0	0	44.07	#NULL!	#NULL!	#NULL!	0	0	0.958	1	2.07	1	#NULL!	9.4492	#NULL!	#NULL!	#NULL!	#NULL!	#NULL!	1	2	2	22.79	22.79	#NULL!	#NULL!	#NULL!	2020-12-30	6
9430219	0	2	2020-12-10	#NULL!	48	21.044	2	2	1	0	16	0	#NULL!	#NULL!	0	0	#NULL!	#NULL!	5.37	0	0	0	25.05	0	#NULL!	#NULL!	#NULL!	#NULL!	12.9	1	12.9	1	#NULL!	8.02225	#NULL!	#NULL!	#NULL!	#NULL!	#NULL!	1	1	2	27.1	27.1	#NULL!	#NULL!	#NULL!	2020-12-15	5
4102476	0	1	2020-12-09	#NULL!	41	20.6823	1	1	#NULL!	#NULL!	#NULL!	#NULL!	#NULL!	#NULL!	0	1	#NULL!	#NULL!	#NULL!	#NULL!	#NULL!	#NULL!	#NULL!	#NULL!	#NULL!	#NULL!	#NULL!	#NULL!	0.1	0	0.15	0	#NULL!	6.23922	#NULL!	#NULL!	#NULL!	#NULL!	#NULL!	1	1	1	22.4	22.4	#NULL!	#NULL!	#NULL!	2020-12-19	10
11769222	0	1	2020-12-28	#NULL!	21	21.3441	1	1	#NULL!	#NULL!	#NULL!	#NULL!	#NULL!	#NULL!	0	0	#NULL!	#NULL!	#NULL!	#NULL!	#NULL!	#NULL!	#NULL!	#NULL!	#NULL!	#NULL!	#NULL!	#NULL!	0.04	0	0.04	0	#NULL!	7.54637	#NULL!	#NULL!	#NULL!	#NULL!	#NULL!	1	3	1	21.6	21.6	#NULL!	#NULL!	#NULL!	2021-01-04	7
1739434	0	1	2020-12-30	#NULL!	26	32.4697	1	1	#NULL!	#NULL!	#NULL!	#NULL!	#NULL!	#NULL!	1	0	#NULL!	#NULL!	#NULL!	#NULL!	#NULL!	#NULL!	#NULL!	#NULL!	#NULL!	#NULL!	#NULL!	#NULL!	0.1	0	0.11	0	#NULL!	9.25006	#NULL!	#NULL!	#NULL!	#NULL!	#NULL!	1	1	3	19.76	19.76	#NULL!	#NULL!	#NULL!	2021-01-09	10
9613124	0	2	2020-07-17	#NULL!	40	17.8673	1	1	#NULL!	#NULL!	#NULL!	#NULL!	#NULL!	#NULL!	0	0	0	0	#NULL!	#NULL!	#NULL!	#NULL!	#NULL!	#NULL!	0	0	26	40	0.311	0	0.642	0	5.80335	5.98705	-0.183707	-3.0684	1	2	2	1	1	2	25.2	24.07	2.3	17	0	2020-07-28	11
5132875	0	1	2020-12-05	#NULL!	39	32.3518	2	2	#NULL!	#NULL!	#NULL!	#NULL!	#NULL!	#NULL!	1	1	#NULL!	#NULL!	#NULL!	#NULL!	#NULL!	#NULL!	#NULL!	#NULL!	#NULL!	#NULL!	67	67	7.53	1	7.53	1	#NULL!	7.40785	#NULL!	#NULL!	#NULL!	#NULL!	#NULL!	1	1	2	24.3	19.64	#NULL!	#NULL!	#NULL!	2020-12-12	7
8713975	0	1	2020-12-19	#NULL!	68	29.0688	1	1	#NULL!	#NULL!	#NULL!	#NULL!	#NULL!	#NULL!	0	0	#NULL!	#NULL!	#NULL!	#NULL!	#NULL!	#NULL!	#NULL!	#NULL!	#NULL!	#NULL!	47	47	0.312	0	0.312	0	#NULL!	9.5802	#NULL!	#NULL!	#NULL!	#NULL!	#NULL!	1	1	2	35.3	35.3	#NULL!	#NULL!	#NULL!	2020-12-20	1
6843192	0	1	2020-11-26	#NULL!	39	32.022	1	1	#NULL!	#NULL!	#NULL!	#NULL!	#NULL!	#NULL!	1	1	#NULL!	#NULL!	#NULL!	#NULL!	#NULL!	#NULL!	#NULL!	#NULL!	#NULL!	#NULL!	#NULL!	#NULL!	0.074	0	0.074	0	#NULL!	11.1327	#NULL!	#NULL!	#NULL!	#NULL!	#NULL!	1	1	2	18.46	18.46	#NULL!	#NULL!	#NULL!	2020-12-10	14
12650297	0	1	2020-11-20	#NULL!	34	22.8164	1	1	1.82	0	#NULL!	#NULL!	#NULL!	#NULL!	0	0	#NULL!	#NULL!	#NULL!	0	#NULL!	#NULL!	#NULL!	#NULL!	#NULL!	#NULL!	#NULL!	#NULL!	#NULL!	0	#NULL!	1	#NULL!	7.46215	#NULL!	#NULL!	#NULL!	#NULL!	#NULL!	1	1	2	14	14	#NULL!	#NULL!	#NULL!	2020-12-04	14
462512	0	1	2020-12-07	#NULL!	30	23.5794	1	1	#NULL!	#NULL!	#NULL!	#NULL!	#NULL!	#NULL!	0	0	#NULL!	#NULL!	#NULL!	#NULL!	#NULL!	#NULL!	#NULL!	#NULL!	#NULL!	#NULL!	#NULL!	#NULL!	0.03	0	0.12	0	#NULL!	5.79188	#NULL!	#NULL!	#NULL!	#NULL!	#NULL!	1	1	2	21.3	18.87	#NULL!	#NULL!	#NULL!	2020-12-17	10
6772586	0	1	2020-12-14	#NULL!	39	17.077	1	1	#NULL!	#NULL!	#NULL!	#NULL!	#NULL!	#NULL!	0	1	#NULL!	#NULL!	#NULL!	#NULL!	#NULL!	#NULL!	#NULL!	#NULL!	#NULL!	#NULL!	#NULL!	#NULL!	0.31	0	1.4	1	#NULL!	8.16265	#NULL!	#NULL!	#NULL!	#NULL!	#NULL!	1	1	2	16.81	15.66	#NULL!	#NULL!	#NULL!	2020-12-27	13
12658002	0	2	2020-12-07	#NULL!	19	22.8819	1	1	#NULL!	#NULL!	#NULL!	#NULL!	#NULL!	#NULL!	0	0	#NULL!	#NULL!	#NULL!	#NULL!	#NULL!	#NULL!	#NULL!	#NULL!	#NULL!	#NULL!	#NULL!	#NULL!	0.82	1	1	1	#NULL!	6.77288	#NULL!	#NULL!	#NULL!	#NULL!	#NULL!	1	1	2	34.11	30.67	#NULL!	#NULL!	#NULL!	2020-12-16	9
12668416	0	1	2020-12-23	#NULL!	34	24.623	1	1	#NULL!	#NULL!	#NULL!	#NULL!	#NULL!	#NULL!	0	0	#NULL!	#NULL!	#NULL!	#NULL!	#NULL!	#NULL!	#NULL!	#NULL!	#NULL!	#NULL!	#NULL!	#NULL!	0.54	0	0.54	0	#NULL!	9.11947	#NULL!	#NULL!	#NULL!	#NULL!	#NULL!	1	1	2	26.42	26.42	#NULL!	#NULL!	#NULL!	2021-01-12	20
3317657	0	1	2020-12-25	#NULL!	57	25.4963	2	2	#NULL!	#NULL!	#NULL!	#NULL!	#NULL!	#NULL!	0	0	#NULL!	#NULL!	#NULL!	#NULL!	#NULL!	#NULL!	#NULL!	#NULL!	#NULL!	#NULL!	#NULL!	#NULL!	14.6	1	16.43	1	#NULL!	15.6096	#NULL!	#NULL!	#NULL!	#NULL!	#NULL!	1	1	2	22.3	22.3	#NULL!	#NULL!	#NULL!	2021-01-08	14
8040722	0	1	2020-12-26	#NULL!	46	27.2535	1	1	#NULL!	#NULL!	#NULL!	#NULL!	#NULL!	#NULL!	0	0	#NULL!	#NULL!	#NULL!	#NULL!	#NULL!	#NULL!	#NULL!	#NULL!	#NULL!	#NULL!	#NULL!	#NULL!	1.5	1	1.5	1	#NULL!	10.718	#NULL!	#NULL!	#NULL!	#NULL!	#NULL!	1	1	2	28.49	24.53	#NULL!	#NULL!	#NULL!	2021-01-04	9
8160718	0	1	2021-01-03	#NULL!	36	25.2598	1	1	#NULL!	#NULL!	#NULL!	#NULL!	#NULL!	#NULL!	0	0	#NULL!	#NULL!	#NULL!	#NULL!	#NULL!	#NULL!	#NULL!	#NULL!	#NULL!	#NULL!	#NULL!	#NULL!	0.32	0	0.32	0	#NULL!	10.7149	#NULL!	#NULL!	#NULL!	#NULL!	#NULL!	1	1	2	21.93	21.93	#NULL!	#NULL!	#NULL!	2021-01-12	9
1952466	0	1	2021-01-07	#NULL!	36	21.8616	2	2	#NULL!	#NULL!	#NULL!	#NULL!	#NULL!	#NULL!	0	0	#NULL!	#NULL!	#NULL!	#NULL!	#NULL!	#NULL!	#NULL!	#NULL!	#NULL!	#NULL!	#NULL!	#NULL!	0.68	0	0.68	0	#NULL!	12.4373	#NULL!	#NULL!	#NULL!	#NULL!	#NULL!	1	1	2	34	31.72	#NULL!	#NULL!	#NULL!	2021-01-09	2
2066006	0	1	2020-12-23	#NULL!	51	25.2264	1	1	#NULL!	#NULL!	#NULL!	#NULL!	#NULL!	#NULL!	1	1	#NULL!	#NULL!	#NULL!	#NULL!	#NULL!	#NULL!	#NULL!	#NULL!	#NULL!	#NULL!	#NULL!	#NULL!	0.23	0	0.23	0	#NULL!	14.0169	#NULL!	#NULL!	#NULL!	#NULL!	#NULL!	1	1	2	36.9	36.9	#NULL!	#NULL!	#NULL!	2020-12-24	1
[truncated: 275 more columns]
